# Supplementary material for: Synthesis, microbial transformation, and pharmacological evaluation of 4,5-dihydronaphtho[2,1-b]furan-2-ones and related analogues
Source: Royal Society of Chemistry journal article supplement (doi:10.1039/c3md00111c), 2013-01-01
Supplement: c3md00111c.pdf [file c3md00111c.pdf]

## Supplementary Material

# Synthesis, Microbial Transformation, and Pharmacological Evaluation of 4,5-Dihydronaphtho[2,1-*b*]furan-2-ones and Related Analogues

Khalid A. El Sayed<sup>a</sup>, Ahmed I. Foudah<sup>a</sup>, Alejandro M.S. Mayer<sup>b</sup>,  
A. Michael Crider<sup>c\*</sup>, Daniel Song<sup>a,d</sup>

*Department of Basic Pharmaceutical Sciences, College of Pharmacy, University of Louisiana at Monroe, Monroe, Louisiana 71201, Department of Pharmacology, Chicago College of Osteopathic Medicine, Midwestern University, Downers Grove, Illinois 60515, and Department of Pharmaceutical Sciences, School of Pharmacy, Southern Illinois University Edwardsville, Edwardsville, IL 62026*

\* To whom correspondence should be addressed. Tel: 618-650-5162. Fax: 618-650-5145.  
E-mail: mcrider@siue.edu

<sup>a</sup> Department of Basic Pharmaceutical Sciences, University of Louisiana at Monroe.

<sup>b</sup> Chicago College of Osteopathic Medicine, Midwestern University.

<sup>c</sup> Department of Pharmaceutical Sciences, Southern Illinois University Edwardsville.

<sup>d</sup> Present Address: Pfizer Inc., Groton, CT 06340.

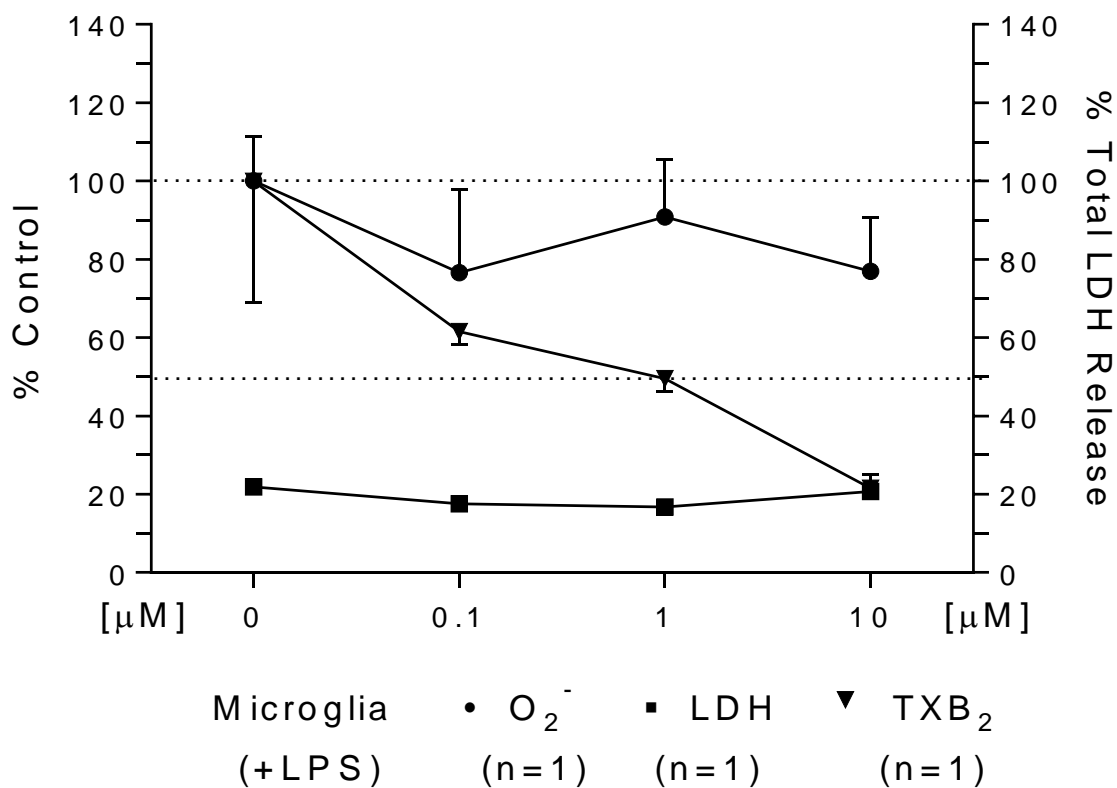

**Fig S11.** Anti-neuroinflammatory activity of **16**. Effects of 0.1 μM, 1 μM, and 10 μM of **2c** on the release of BMΦ  $O_2^-$  and  $TXB_2$ , and concomitant induction of lactate dehydrogenase (LDH) on LPS- activated rat neonatal brain microglia (BMΦ).

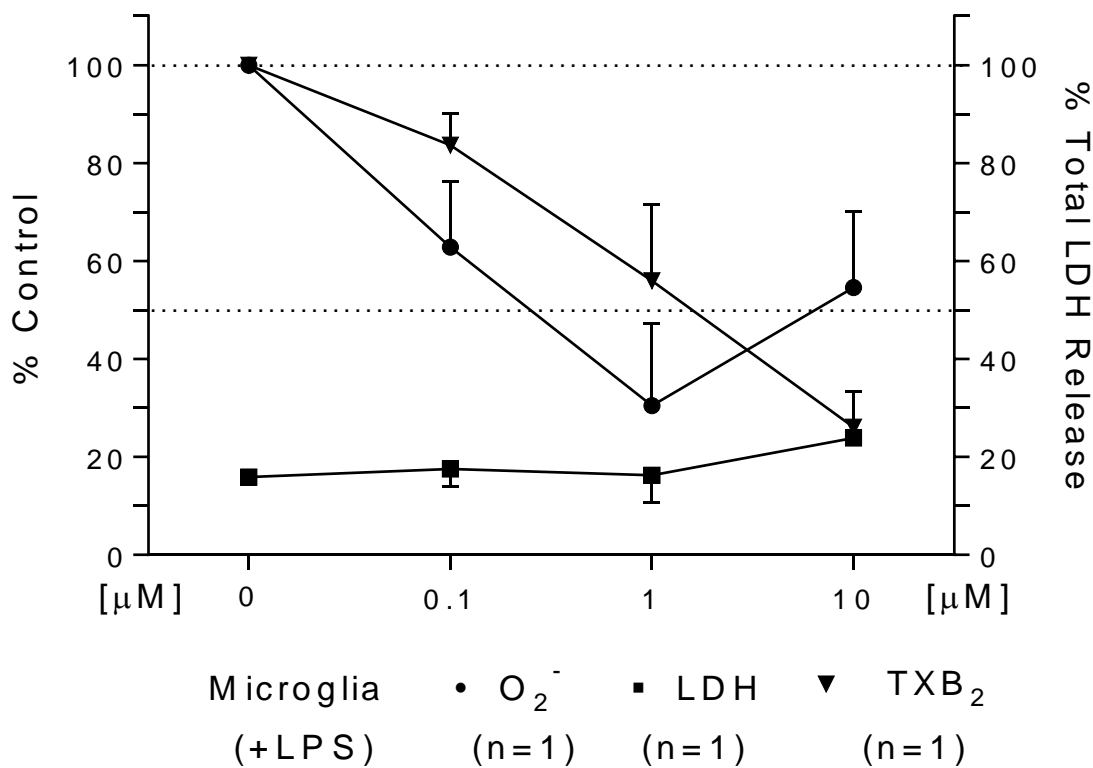

**Fig SI2.** Anti-neuroinflammatory activity of 16. Effects of 0.1 μM, 1 μM, and 10 μM of 16 on the release of BMΦ O<sub>2</sub><sup>-</sup> and TXB<sub>2</sub>, and concomitant induction of lactate dehydrogenase (LDH) on LPS- activated rat neonatal brain microglia (BMΦ).

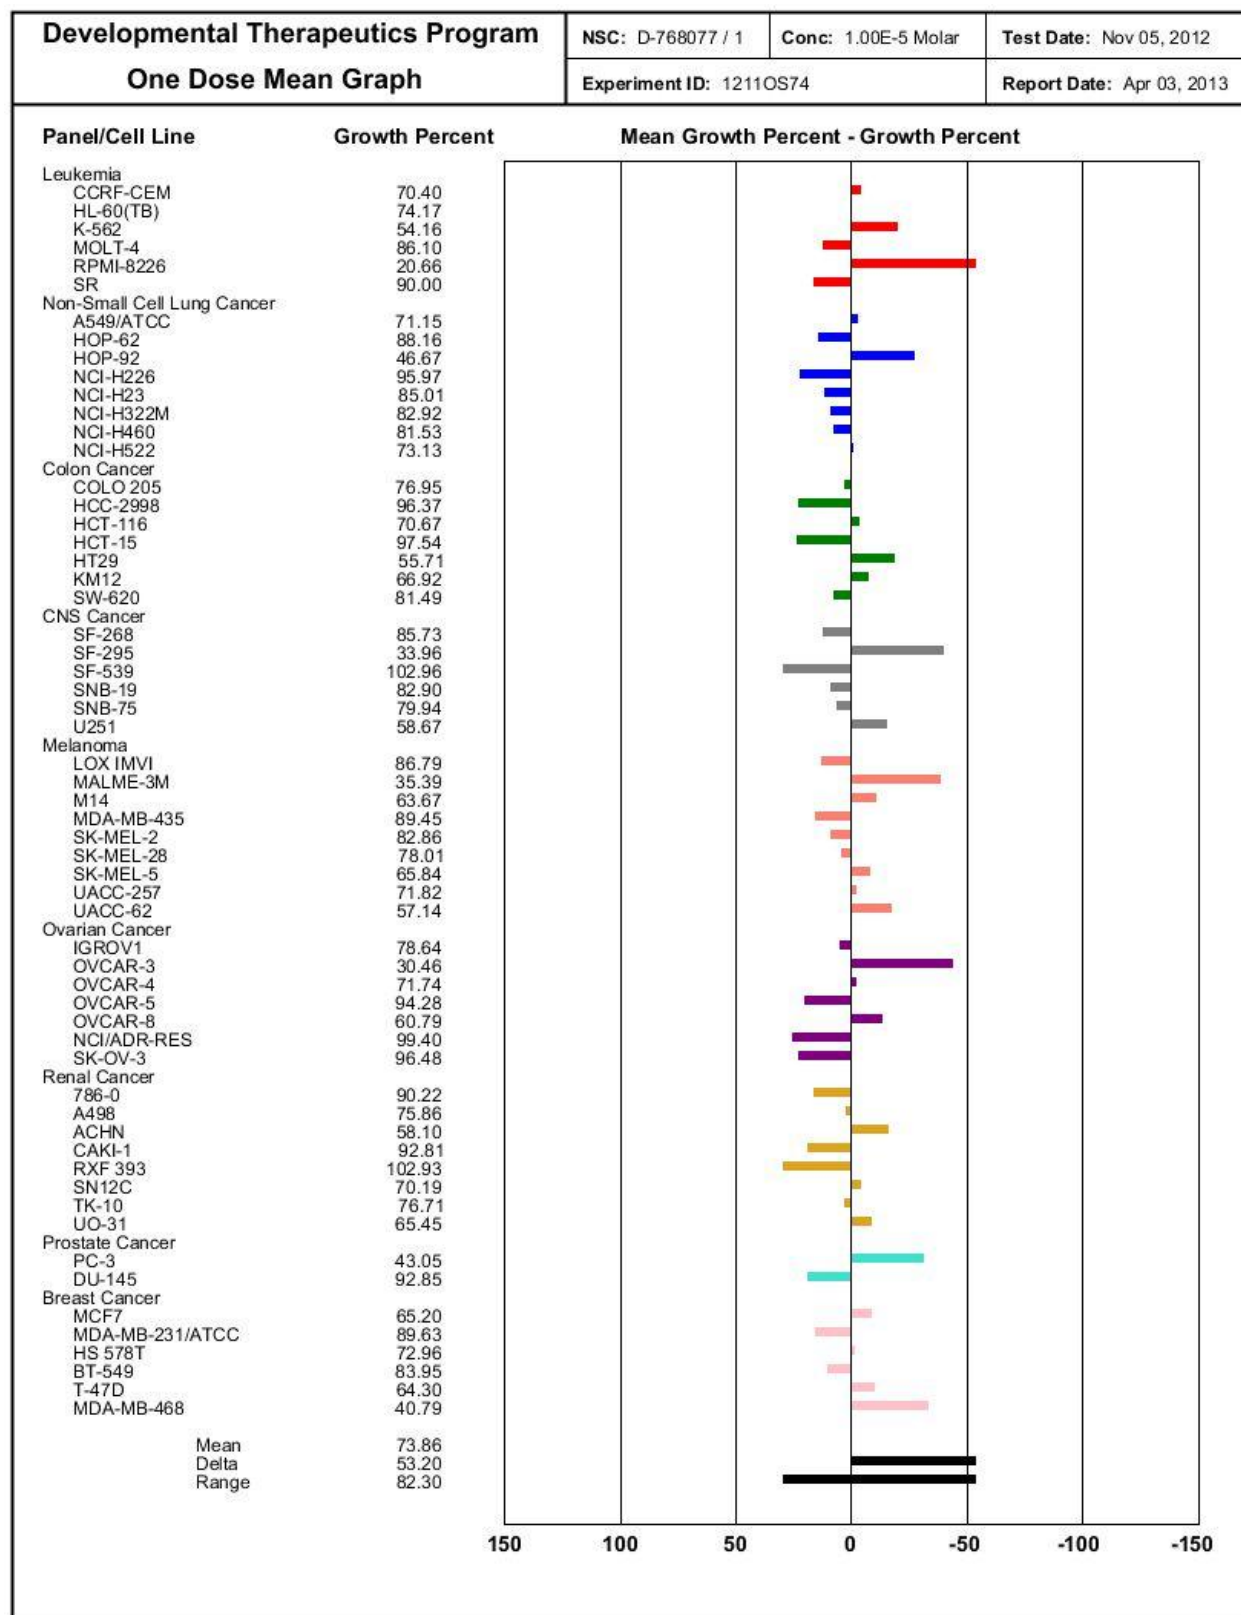

**Fig SI3.** Mean graph of the effect of 10  $\mu$ M dose of **2b** on the percent growth of the NCI's 60 cell lines.

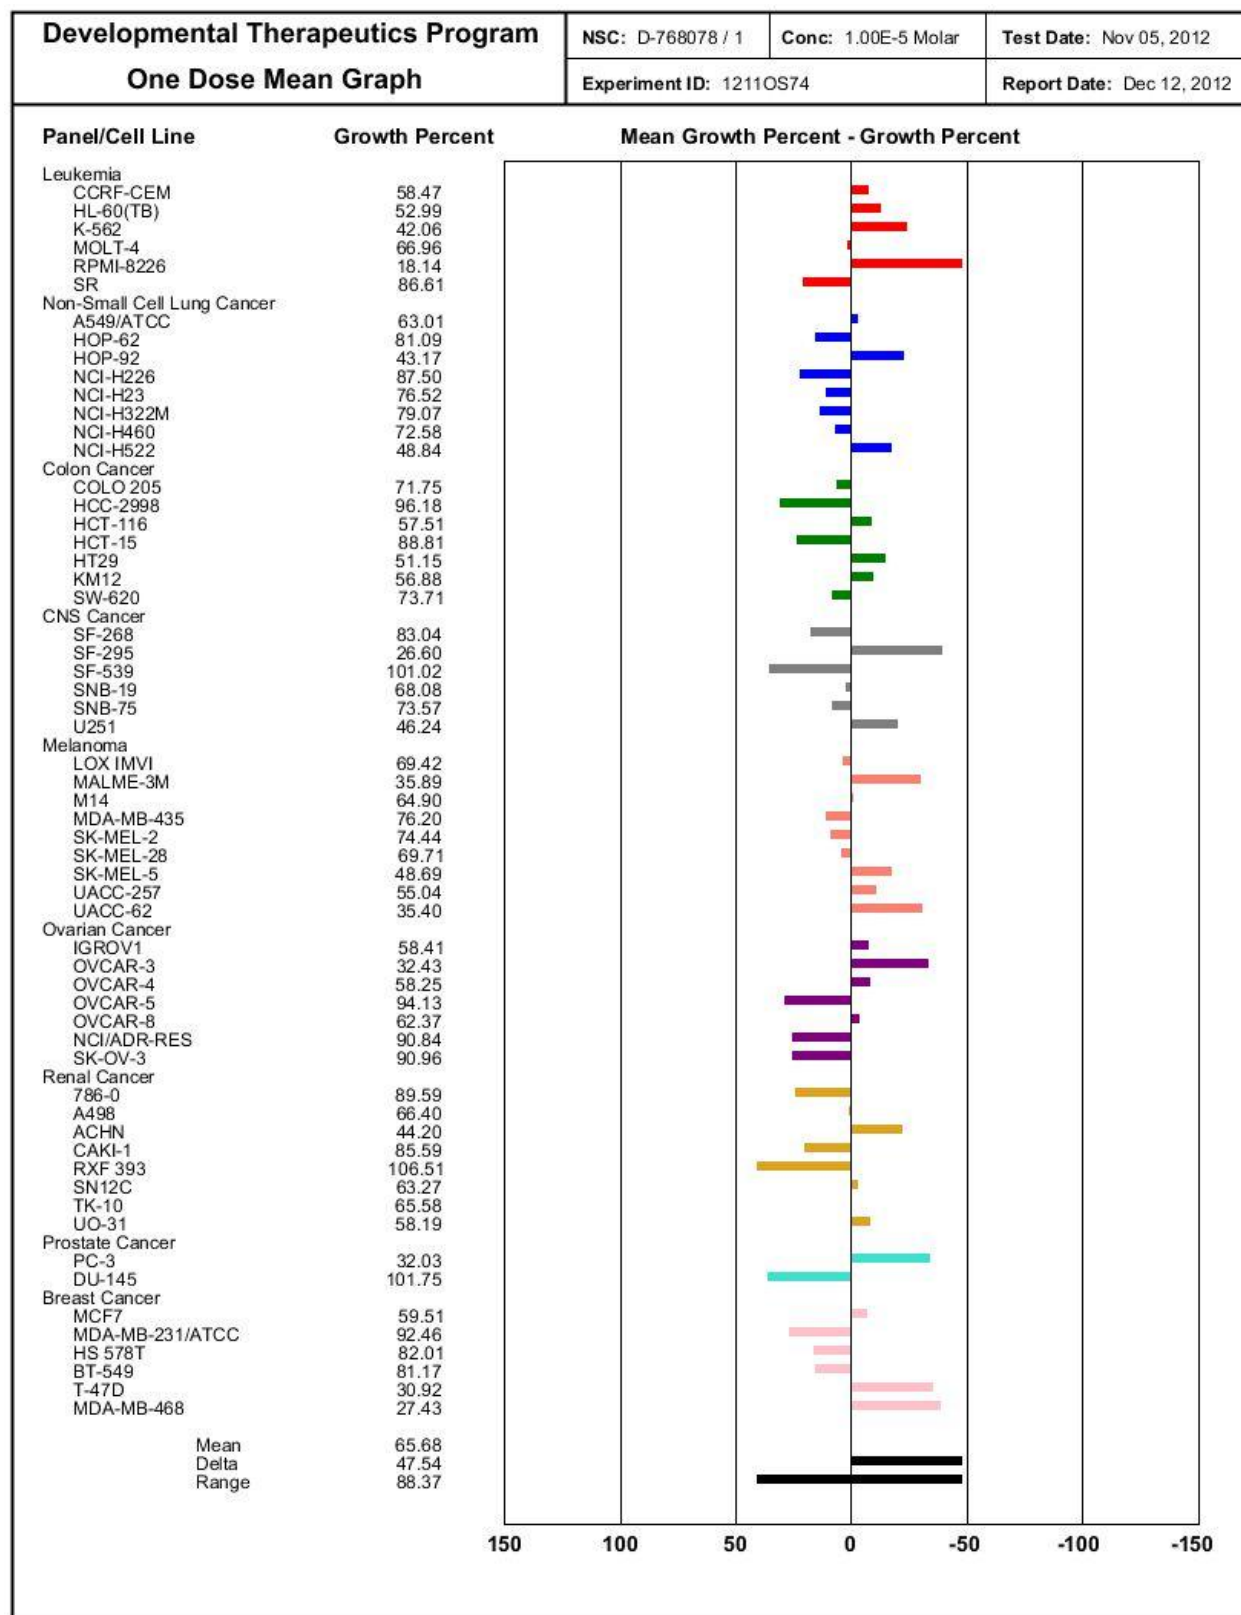

**Fig S14.** Mean graph of the effect of 10  $\mu$ M dose of **2c** on the percent growth of the NCI's 60 cell lines.

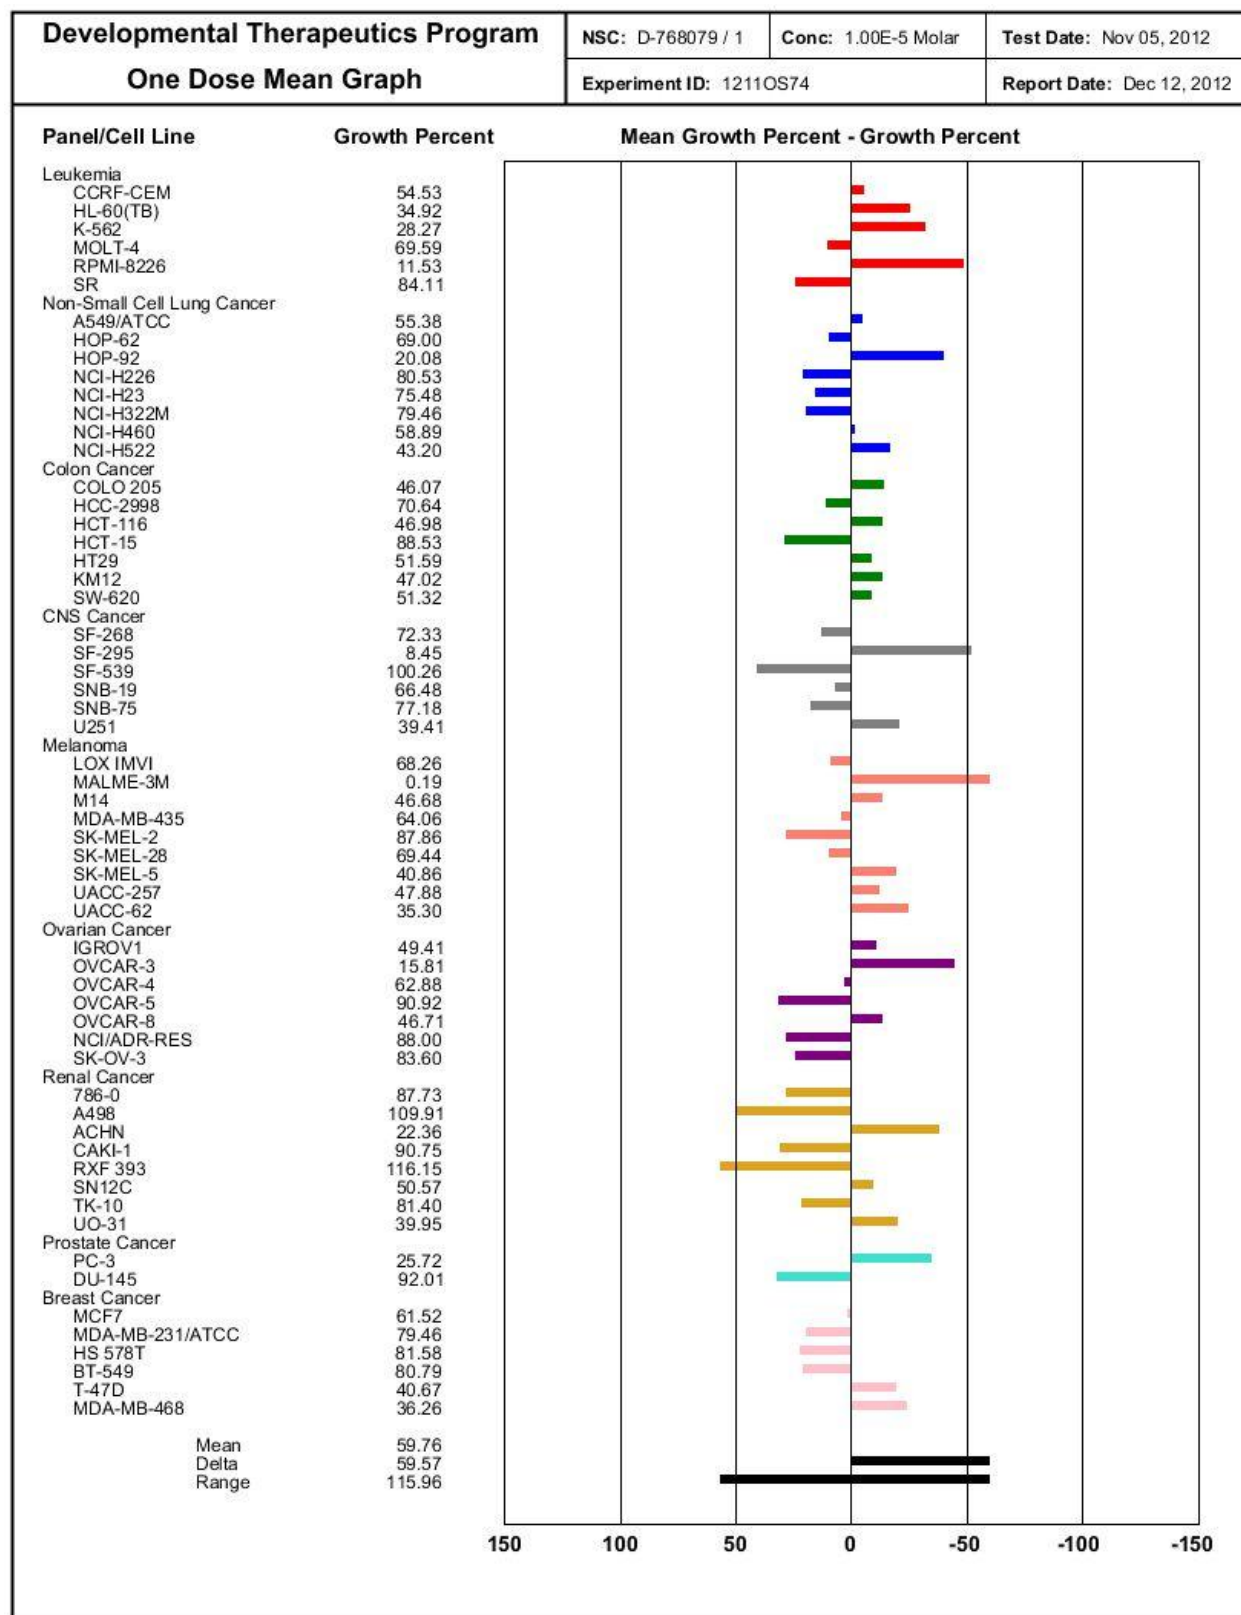

**Fig S15.** Mean graph of the effect of 10  $\mu$ M dose of **16** on the percent growth of the NCI's 60 cell lines.
